# Supplementary material
Source: PubMed Central journal article supplement (PMC2957794)
Supplement: e2c42fe57c22622012bb4546a31715a7_figS1-S3.pdf [file e2c42fe57c22622012bb4546a31715a7_figS1-S3.pdf]

# Supplemental Figure 1.

A. Overlap of top 30 Human gene sets in three independent Human gene expression studies .

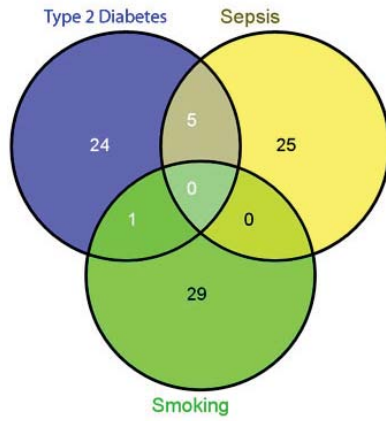

B. Overlap of top 30 Mouse gene sets in three independent Mouse gene expression studies .

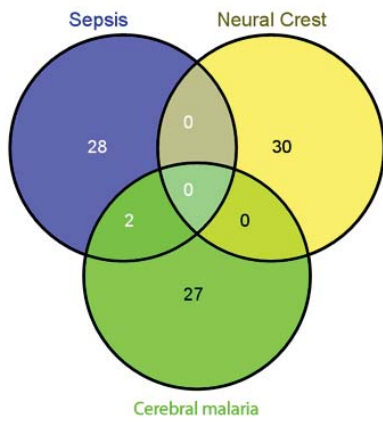

C. Overlap of top 30 Mouse gene sets in three independent Human gene expression studies .

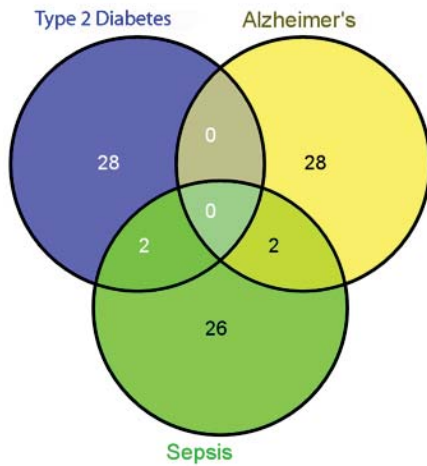

## Alpha - Synuclein Knockout

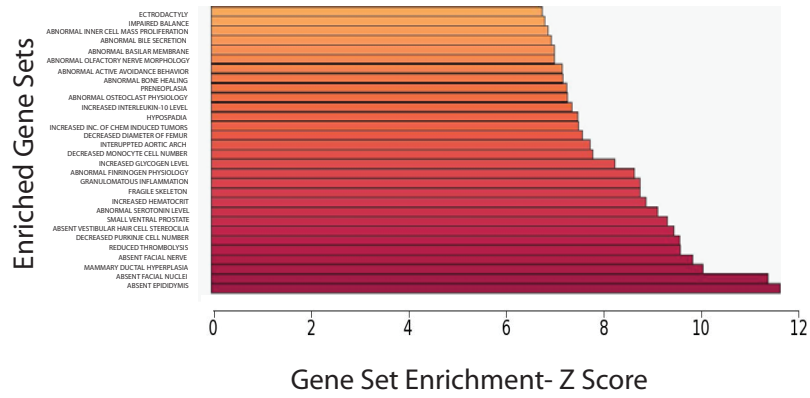

1 a)

| Gene set                                      | (emperical_p)        | (p1000)              |
|-----------------------------------------------|----------------------|----------------------|
|                                               | Diabetes vs. Control | Diabetes vs. Control |
| OBSESITY                                      | 3.0068E-07           | 7.4076E-07           |
| METABOLIC_SYNDROME_X                          | 0.0055784            | 0.00073253           |
| BRAIN_ISCHEMIA                                | 0.000063102          | 0.001035             |
| HYPERTRIGLYCERIDEMIA                          | 0.0045224            | 0.0013847            |
| BODY_WEIGHT                                   | 0.0088178            | 0.0014522            |
| INSULIN_RESISTANCE                            | 0.0040196            | 0.0018119            |
| MENTAL_RETARDATION                            | 0.00100062           | 0.00281              |
| NEOPLASM_METASTASIS                           | 0.0048278            | 0.0038426            |
| PRE-ECLAMPSIA                                 | 0.020742             | 0.0037546            |
| HYPERTROPHY_LEFT_VENTRICULAR                  | 0.02835              | 0.0055632            |
| ABRUPTIO_PLACENTAE                            | 0.0031176            | 0.0082935            |
| KIDNEY_DISEASES                               | 0.032776             | 0.0056388            |
| HYPERINSULINISM                               | 0.0175314            | 0.0051668            |
| HYPERLIPIDEMIAS                               | 0.02364              | 0.0071137            |
| KIDNEY_FAILURE_CHRONIC                        | 0.0071476            | 0.0086369            |
| DIABETES_MELLITUS_TYPE_2                      | 0.0133476            | 0.0092131            |
| HYPERCHOLESTEROLEMIA                          | 0.022926             | 0.0091805            |
| POLYCYSTIC_OVARY_SYNDROME                     | 0.026574             | 0.012877             |
| VENOUS_THROMBOSIS                             | 0.0097108            | 0.018037             |
| CARDIOMYOPATHY_HYPERTROPHIC                   | 0.0108394            | 0.012881             |
| HYPERTENSION                                  | 0.027906             | 0.01611              |
| FETAL_GROWTH_RETARDATION                      | 0.029482             | 0.015034             |
| TOURETTE_SYNDROME                             | 0.0112824            | 0.015809             |
| ABORTION_HABITUAL                             | 0.0103886            | 0.017744             |
| LARYNGEAL_NEOPLASMS                           | 0.025996             | 0.01978              |
| CORONARY_DISEASE                              | 0.029984             | 0.016794             |
| CARDIOVASCULAR_DISEASES                       | 0.055996             | 0.022346             |
| ARTHRITIS                                     | 0.025966             | 0.0285               |
| ATTENTION_DEFICIT_DISORDER_WITH_HYPERACTIVITY | 0.032798             | 0.022831             |
| PSYCHOTIC_DISORDERS                           | 0.0068932            | 0.024131             |
| MOOD_DISORDERS                                | 0.042728             | 0.02561              |
| CEREBROVASCULAR_ACCIDENT                      | 0.02442              | 0.031062             |
| HIP_FRACTURES                                 | 0.0150896            | 0.033106             |
| NEUROTIC_DISORDERS                            | 0.034202             | 0.034203             |
| HEAD_AND_NECK_NEOPLASMS                       | 0.04242              | 0.02629              |
| PREGNANCY_COMPLICATIONS_CARDIOVASCULAR        | 0.046064             | 0.032019             |
| HEPATITIS_B                                   | 0.020334             | 0.030973             |
| BRAIN_NEOPLASMS                               | 0.03358              | 0.03745              |
| CEREBROVASCULAR_DISORDERS                     | 0.046322             | 0.034598             |
| AMPHETAMINE-RELATED_DISORDERS                 | 0.035314             | 0.04473              |

2  
3  
4  
5

b)

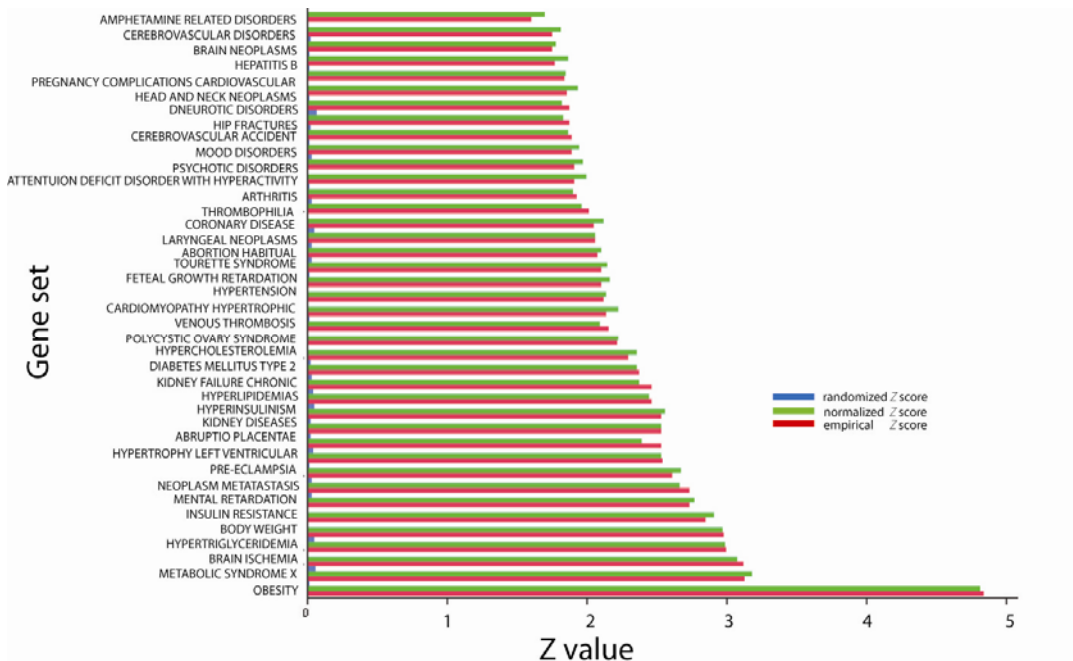

6

## Supplementary Figure 1. Gene set overlap

### A. Overlap of human gene sets vs human gene expression

Overlap in the top 30 gene sets between Human Type 2 Diabetes -ArrayExpress # E-CBIL-30, Sepsis-GEO #GSE8182, and Smoking – GEO # GSE994, using the human GAD disease gene sets. The  $R^2$  value of all human GAD gene sets between all three analyses are: Type 2 diabetes vs. Sepsis:  $R^2= 0.0005$ ; Sepsis vs. Smoking:  $R^2= 0.0094$ ; Smoking vs. Type 2 Diabetes:  $R^2= 0.0021$

### B. Overlap of mouse gene sets vs mouse gene expression

Overlap in the top 30 gene sets between mouse Sepsis –GEO # GSE4479, Neural crest/development-GEO #GSE11356, and Cerebral Malaria – GEO # GSE7814, using the mouse MP gene sets. The  $R^2$  value of all mouse MP gene sets between all three analyses are: Sepsis vs. Neural crest/ development:  $R^2= 0.0051$ ; Neural crest/ development vs. Cerebral Malaria:  $R^2= 0.015$ ; Cerebral Malaria vs. Sepsis:  $R^2= 0.00002$

### C. Overlap of mouse gene sets vs human gene expression

Overlap in the top 30 gene sets between Human Type 2 Diabetes -ArrayExpress # E-CBIL-30, Alzheimer's GEO# GSE2197, and human Sepsis-GEO #GSE8182, using the mouse MP gene sets. The  $R^2$  values of all mouse MP gene sets between all three analyses are: Type 2 Diabetes vs. Alzheimer's:  $R^2= 0.0037$ ; Alzheimer's vs. Sepsis:  $R^2= 0.0017$ ; Sepsis vs. Type 2 Diabetes:  $R^2= 0.0014$

**Supplemental Figure 2. Mouse Alpha-Synuclein Knockout-Brain versus Mouse gene sets.** Ribbon graphs of the top 30 highest Z-scores of the statistically significant ( $p < 0.05$ ) PAGE results in a mouse Alpha-Synuclein Knockout mouse model. Alpha-Synuclein GEO # GSE4758, using the mouse MP gene sets. These results are not biased toward brain physiology as reflective of the ubiquitous nature of alpha-synuclein expression.

**Supplementary Figure 3.**

**Empirically determined p values versus permutation determined p values**

- A.** Comparison of empirical  $p$  values versus permuted  $p$  values of the top 40 gene sets.
- B.** Comparison of empirical Z value (red), randomized (blue), and normalized (green) enrichment scores. The empirical Z score is calculated using our Z score formula directly from our D/P webPAGE utility using the gene expression change ratios. The randomized Z score is the mean value of the Z score that produced by 1000 permutations of the gene expression change ratios and also 400 permutation of the gene set labels at the same time. The normalized Z score is obtained by adopting the empirical Z score and normalizing it by the mean of 1000 times the Z score of the gene set.
